# **Broadly-neutralizing antibodies that bind to the influenza hemagglutinin stalk domain enhance the effectiveness of neuraminidase inhibitors via Fc-mediated effector functions**

Ali Zhang<sup>1,2,3</sup>, Hanu Chaudhari<sup>1,2,3</sup>, Yonathan Agung<sup>1,2,3</sup>, Michael R. D'Agostino<sup>1,2,3</sup>, Jann C. Ang<sup>1,2,3</sup>, Matthew S. Miller<sup>1,2,3†</sup>

<sup>1</sup>Michael G. DeGroote Institute for Infectious Diseases Research, McMaster University, Hamilton, ON, Canada, L8S 4K1

<sup>2</sup>McMaster Immunology Research Centre, McMaster University, Hamilton, ON, Canada, L8S 4K1

<sup>3</sup>Department of Biochemistry and Biomedical Sciences, McMaster University, Hamilton, ON, Canada, L8S 4K1

†To Whom Correspondence Should be Addressed

Corresponding author contact: [mmiller@mcmaster.ca](mailto:mmiller@mcmaster.ca)

**Keywords:** influenza virus; broadly-neutralizing antibodies; oseltamivir; NA inhibitors; antibodies; Fc receptors; antivirals, antibody-dependent cell cytotoxicity

34

## 35 **Summary (117/150 words)**

36

37 The conserved hemagglutinin stalk domain is an attractive target for broadly effective antibody-based  
38 therapeutics and next generation universal influenza vaccines. Protection provided by hemagglutinin stalk  
39 binding antibodies is principally mediated through activation of immune effector cells. Titers of stalk-binding  
40 antibodies are highly variable on an individual level, and tend to increase with age as a result of increasing  
41 exposures to influenza virus. In our study, we show that stalk-binding antibodies cooperate with neuraminidase  
42 inhibitors to protect against influenza virus infection in an Fc-dependent manner. These data suggest that the  
43 effectiveness of neuraminidase inhibitors is likely influenced by an individual's titers of stalk-binding  
44 antibodies, and that neuraminidase inhibitors may enhance the effectiveness of future stalk-binding monoclonal  
45 antibody-based treatments.

46

## 47 **Introduction**

48

49 Influenza causes 3-5 million serious illnesses and 290,000 – 645,000 deaths every year worldwide (Iuliano et  
50 al., 2018). Seasonal influenza vaccination induces production of mostly neutralizing antibodies directed against  
51 the hemagglutinin (HA) head domain and is the most effective way to prevent infection. The HA head domain  
52 undergoes continuous antigenic drift, which necessitates annual reformulation of seasonal vaccines to narrow  
53 strain-specific protection. Novel vaccine strategies designed to elicit immune responses against more conserved  
54 protein domains, such as the HA stalk domain by broadly neutralizing antibodies (bNAbs), may achieve more  
55 broad and durable protection against influenza.

56

57 The HA stalk domain is more conserved between influenza virus strains compared to the HA head domain due  
58 to functional constraints and minimal immune pressure (Kirkpatrick et al., 2018; Wu and Wilson, 2017).  
59 Protection against influenza by HA stalk-binding antibodies is mediated primarily by Fc-dependent activation  
60 of immune effector cells (DiLillo et al., 2016, 2014; He et al., 2016). Optimal Fc activation by these antibodies  
61 requires two points of contact: the antibody Fab-HA stalk interaction, and the sialic acid-HA head interaction  
62 (Leon et al., 2016) (Figure 1A). Neuraminidase (NA), the other major influenza virus surface glycoprotein,  
63 cleaves sialic acids from the HA head domain during viral budding. Antibody dependent cellular cytotoxicity  
64 (ADCC) is a process through which infected cells are eliminated by Fc receptor (FcR)-bearing immune cells  
65 after binding of antibodies to surface-bound antigen. Antibodies that bind to NA can induce modest levels of  
66 ADCC on their own and can also cooperate with stalk-binding antibodies to enhance ADCC induction (He et  
67 al., 2016). HA-stalk binding antibodies can, in turn, partially inhibit neuraminidase activity, contributing to

68 their potency of virus neutralization (Kosik et al., 2019). Since cleavage of the sialic acid-HA head interaction  
69 by neuraminidase may destabilize one of the two points of contact required for optimal stalk antibody-mediated  
70 activation of immune effector cells, we reasoned that chemical inhibition of NA activity may also potentiate  
71 ADCC induction by HA stalk-binding antibodies.

72  
73 Here, we show that chemical inhibition of neuraminidase increases stalk antibody Fc-mediated activation of  
74 immune effector cells in a dose dependent manner. HA stalk antibodies potentiated the efficacy of the NA  
75 inhibitor oseltamivir in both prophylactic and therapeutic contexts. This effect is preserved in the contexts of  
76 both monoclonal stalk antibody and polyclonal sera. Cooperativity between neuraminidase inhibition and HA  
77 stalk antibodies was dependent on Fc-FcR interaction. Together, these data suggest that the efficacy of  
78 oseltamivir treatment may be dependent on HA stalk antibody titers, and that monoclonal HA stalk antibodies  
79 and neuraminidase inhibitors may represent an effective combination therapy in the future.

## 80 81 **Results**

### 82 83 **Oseltamivir cooperates with stalk-binding antibodies to enhance antibody-dependent cell** 84 **cytotoxicity of cells infected with group 1 and group 2 influenza A viruses.**

85  
86 We first set out to determine the role of neuraminidase on HA stalk-binding antibody mediated activation of  
87 immune effector cells. We first quantified the NA activity of three representative strains of influenza virus,  
88 A/Puerto Rico/8/1934 H1N1 (PR8), A/California/07/2009 H1N1 (Cal/09), and X-31 H3N2 (Figures S1A-S1C)  
89 (Kilbourne, 1969). We then tested the potency of oseltamivir in inhibiting the NA activity of these strains  
90 (Figures S1D-F), and in reducing viral replication (Figures S1G-S1I). Having established these dose-response  
91 relationships with oseltamivir, we performed antibody dependent cell cytotoxicity (ADCC) assays using  
92 modified Jurkat effector cells expressing murine Fc $\gamma$ RIV. This is an extremely sensitive, highly quantitative  
93 assay that we have used extensively in the past and has been validated to correlate closely with the activation of  
94 primary NK cells (Chromikova et al., 2020; He et al., 2016). A549 target cells were infected with PR8, Cal/09,  
95 or X-31 at an MOI of 5. The infected cells were then incubated with oseltamivir and murine monoclonal stalk-  
96 binding broadly neutralizing antibodies (bNAbs) 6F12 for cells infected with PR8 and Cal/09 (which express  
97 group 1 HA), and 9H10 for cells infected with X-31 (which expresses group 2 HA). Infection and binding  
98 specificity of antibodies was verified by immunofluorescence microscopy (Figure S2). Addition of oseltamivir  
99 resulted in a dose-dependent enhancement of ADCC induction in PR8, Cal/09 and X-31 infected cells (Figures  
100 1B-D). Enhancement of bNAb-mediated ADCC by oseltamivir required Fc-FcR interaction, as 6F12 with the  
101 D265A mutation, which abrogates FcR binding, failed to induce ADCC of PR8 infected cells, even at the

102 highest oseltamivir concentration used (Figure 1E). Together, these results demonstrate that NA inhibition by  
103 oseltamivir enhances ADCC induction by bNABs that bind to the HA stalk domain, demonstrating cooperative  
104 activation.

## 106 **The efficacy of oseltamivir in preventing and treating influenza virus is potentiated by bNABs**

107  
108 To determine whether bNABs could enhance protection mediated by oseltamivir *in vivo*, we conducted  
109 influenza challenge experiments in a murine model system. To test efficacy in a prophylaxis setting, six groups  
110 of 6-8 week old BALB/c mice (n = 5 mice/group) were administered 1mg/kg 6F12, 6F12 D265A, or IgG  
111 isotype control intraperitoneally and 1mg/kg oseltamivir or PBS by oral gavage. The mice were then infected  
112 with  $5 \times LD_{50}$  of PR8 (500 plaque-forming units (PFU)) intranasally two hours later. Mice continued to receive  
113 either oseltamivir or PBS twice daily by oral gavage for 5 days and were monitored for 14 days, with the  
114 humane endpoint defined as 80 % of initial body weight (Figures 2A-C). Mice that received negative control  
115 treatments all reached endpoint by day 7 post-infection. Of the mice that did not receive oseltamivir, treatment  
116 with 1 mg/kg 6F12 resulted in similar disease progression compared to the IgG isotype control. Similarly, mice  
117 that received oseltamivir alone experienced significant weight loss. In contrast, mice that received both  
118 oseltamivir and 6F12 lost minimal weight throughout the experimental period, with none reaching endpoint.  
119 Mice that received both oseltamivir and 6F12 D265A displayed similar disease progression compared to mice  
120 that received oseltamivir alone, demonstrating that Fc-FcR interactions are crucial for the enhanced protection  
121 offered by co-administration of 6F12 and oseltamivir.

122  
123 To determine if bNABs could also enhance the activity of oseltamivir when treating an established influenza  
124 infection, we infected four groups of 6-8 week old BALB/c mice (n = 5 mice/group) with  $5 \times LD_{50}$  of PR8 (500  
125 PFU) and treated with 10mg/kg 6F12 or 10mg/kg oseltamivir starting 2 days post-infection (Figures 2D-E).  
126 Antibody or oseltamivir alone were insufficient to protect mice from severe disease, whereas the combination of  
127 6F12 and oseltamivir yielded complete protection. These results demonstrate a substantial improvement in  
128 protection against influenza morbidity and mortality when oseltamivir and stalk-binding antibodies are  
129 administered together in the context of both prophylaxis and treatment. The cooperativity of oseltamivir and  
130 stalk-binding antibodies was not due to their independent activities (i.e., direct neuraminidase inhibition and  
131 virus neutralization), but was instead dependent upon Fc-FcR interactions mediated by the stalk-binding  
132 antibodies.

## 134 **Titers of bNABs in human serum predict effectiveness of oseltamivir treatment**



136 The previous results demonstrate that oseltamivir cooperates with monoclonal stalk-binding antibodies to  
137 protect against clinical signs of influenza virus infections by enhancing antibody Fc-mediated immune effector  
138 cell activation. We next set out to determine if titers of bNAbs in human serum could predict the effectiveness  
139 of oseltamivir treatment. First, we conducted ADCC assays using serum from 4 adult donors who had received  
140 the seasonal influenza vaccine 14 days prior to serum collection. Titers of bNAbs in these samples were first  
141 quantified by ELISA using a chimeric cH6/1 hemagglutinin protein, that contains the head domain from  
142 A/Mallard/Sweden/81/02 H6N1 and the stalk domain from A/Puerto Rico/8/1934 H1N1 (Figures 3A and 3B).  
143 The cH6/1 chimera has been used extensively in the past to quantify antibodies that specifically bind to the  
144 group 1 stalk domain, as humans are rarely exposed to H6 influenza viruses and we have previously shown that  
145 human sera lacks hemagglutination inhibition (HAI) activity against the H6 head domain (Miller et al., 2013b;  
146 Nachbagauer et al., 2014; Pica et al., 2012; Sangster et al., 2013). Consistent with the observations made using  
147 monoclonal bNAbs, ADCC induction by polyclonal bNAbs from human donors was enhanced by oseltamivir  
148 (Figures 3C-3F).

149  
150 We next set out to assess the effectiveness of human sera in combination with oseltamivir in protecting against a  
151 representative “pandemic-like” virus. We then chose to use A/Vietnam/1203/2004 H5N1 HA<sub>0</sub> (Viet/04), which  
152 is a an H5N1 virus that is highly pathogenic in mice, but has had the polybasic cleavage site of the H5 protein  
153 removed to enhance safety (Steel et al., 2009). ELISAs were first performed on the serum from two additional  
154 healthy adult donors using the chimeric cH6/1 hemagglutinin protein to quantify bNAb titers (Figures S3A and  
155 S3B)., To ensure that the serum samples used in these assays did not contain HAI+ antibodies to the head  
156 domain of Viet/04 H5, we conducted a HAI assay (Figure S3C). No HA inhibition was observed, indicating that  
157 both donors were naïve to this virus. In ADCC assays, the donor with higher titers of HA stalk-binding  
158 antibodies based on ELISA data (Figure S3A) also elicited higher activation of reporter cells, consistent with  
159 expectations (Figure S3D).

160  
161 Next, six groups of 6-8 week old BALB/c mice were either administered 150ul of serum with low titers of stalk-  
162 binding antibodies (Low Serum), 150ul of serum with high titers of stalk-binding antibodies (High Serum), or  
163 150ul of PBS (vehicle). The mice were also given either 0.1mg/kg oseltamivir or PBS by oral gavage. The mice  
164 were infected with  $5 \times LD_{50}$  of Viet/04 H1N1 (200 PFU) intranasally two hours after passive transfer of serum  
165 (Figure 4A). The data is displayed as two sets of graphs for clarity, with shared negative control groups (Figures  
166 4B-4E). Mice that received either serum or oseltamivir alone experienced significant morbidity, with most  
167 animals in those groups reaching endpoint. When oseltamivir was administered to mice that had received serum  
168 containing low titers of bNAbs (Low Serum), weight loss was similar to that of mice treated with serum or  
169 oseltamivir alone; however, mortality in this group improved substantially, with only 1 out of 5 mice reaching  
170 endpoint. In contrast, when oseltamivir was administered to mice that received serum containing high titers of

171 bNAb (High Serum) minimal weight loss was observed, and full protection against mortality was achieved  
172 (Figures 4B-4E). Taken together, these results demonstrate that titers of bNAbs found in human serum can  
173 significantly impact the efficacy of oseltamivir treatment.

## 175 Discussion

176  
177 Neuraminidase inhibitors are a major class of antivirals used for treatment and prevention of influenza virus.  
178 While NA inhibitors tend to be highly effective in preventing influenza when administered prophylactically,  
179 effectiveness is much more modest in most therapeutic contexts (Doll et al., 2017). Maximum benefit is  
180 achieved therapeutically when NA inhibitors are administered early after symptom onset (Fry et al., 2014; Hiba  
181 et al., 2011; Rodríguez et al., 2011). However, there is considerable heterogeneity in the effectiveness of these  
182 drugs at the individual level, and the host factors that determine outcome remain elusive (Jefferson et al., 2014).  
183 Furthermore, neuraminidase inhibitor-resistant viruses circulate naturally, and therefore strategies that mitigate  
184 the selection of these resistant variants are critical to prolonging the utility of this class of drug (Lampejo,  
185 2020).

186  
187 The hemagglutinin stalk domain is an attractive target for antibody-based therapeutics and universal influenza  
188 vaccines due to its high degree of conservation amongst diverse influenza viruses. The main mechanism by  
189 which these antibodies protect against influenza is through Fc-dependent effector cell functions, such as ADCC,  
190 NETosis, phagocytosis, and secretion of cytokines (DiLillo et al., 2016, 2014; He et al., 2017; Stacey et al.,  
191 2021). Elegant studies by the Yewdell laboratory previously demonstrated that NA inhibition by anti-HA stalk  
192 antibodies contributes to viral neutralization and induction of Fc $\gamma$ R-mediated activation of innate immune cells  
193 (Kosik et al., 2019). We have also previously shown that antibodies with NAI activity can cooperate with  
194 bNAbs that bind to the HA stalk to potentiate ADCC (He et al., 2016). Our current study demonstrates that the  
195 efficacy of NA inhibitors is profoundly influenced by pre-existing titers of bNAbs, and that protection from  
196 influenza *in vivo* is mediated by potentiation of Fc-dependent effector functions of immune cells mediated by  
197 NA inhibition.

198  
199 We used the well-characterized monoclonal murine antibodies 6F12 and 9H10, which bind to H1 and group 2  
200 HA respectively, in our ADCC assays (Tan et al., 2014, 2012). Our ADCC assay uses engineered Jurkat  
201 effector cells, which express murine Fc $\gamma$ RIV and firefly luciferase driven by the nuclear factor of activated T  
202 cells (NFAT) response element. ADCC induction in these assays correlate well with classical CD107a NK cell  
203 degranulation assays (Chromikova et al., 2020). We found that oseltamivir potentiated ADCC induced by  
204 bNAbs in a dose-dependent manner. Intact Fc-FcR interactions were absolutely necessary for this potentiation,  
205 as introduction of a D265A mutation in the CH2 domain of 6F12, which abolishes the Fc-FcR interaction,

negated effector cell induction (Baudino et al., 2008; Nimmerjahn et al., 2005; Temming et al., 2020). The addition of oseltamivir had similar effects in improving ADCC mediated by serum from healthy donors. Effector cell activation is strikingly enhanced even in samples with low titers of bNAbs. Antibodies targeting the less immunogenic NA, M2, and NP have also been shown to induce effector cell activation (DiLillo et al., 2016; Jegaskanda et al., 2017; Lee et al., 2014; Stadlbauer et al., 2019). Our experiments here show that chemical inhibition of neuraminidase can further enhance induction of ADCC even in a complex, polyclonal context.

Consistent with previous studies, we found that co-administration of oseltamivir with a sub-protective dose of monoclonal HA stalk-binding antibodies improve protection against lethal influenza challenge in mouse models (Nakamura et al., 2013; Paules et al., 2017). However, our work clearly demonstrates that this enhancement is dependent upon Fc-FcR interactions, and is not due to the combined, independent activities of oseltamivir and bNAbs. To test whether titers of bNAbs in human serum might impact the effectiveness of oseltamivir treatment, we passively transferred mice with human sera containing either “low” or “high” titers of bNAbs. The effectiveness of oseltamivir treatment was proportional to the titers of bNAbs transferred to the mice. Together, these data strongly suggest that an individual’s pre-existing titers of bNAbs may have a profound impact on the effectiveness of oseltamivir treatment.

Our data provide new insights that help to explain the heterogeneity in effectiveness of NA inhibitors at the individual level. In the future, human clinical trials that directly assess whether pre-existing titers of bNAbs predict the effectiveness of NA inhibitor treatment could have important clinical implications that inform selection of the most appropriate antiviral treatments for individuals with influenza – especially in light of the recent approval of baloxivir marboxil, which targets the cap-snatching endonuclease activity of the viral polymerase complex (Noshi et al., 2018). These drugs have similar clinical effectiveness and thus, an evidence-based framework to guide which drug may be most effective for individual patients is sorely needed. While rapid screening of bNAb titers may be possible in the future, it is also known that titers of these antibodies tend to increase with age (Miller et al., 2013a; Nachbagauer et al., 2016). Our study also suggests that the effectiveness of future bNAb-based monoclonal antibody therapies could be improved by coadministration with NA inhibitors. This class of drugs may be especially important for providing first-line defense in the event of a future influenza virus pandemic, since prediction of which strains are likely to cause pandemics remains a considerable challenge to strain-specific pandemic vaccine design (Miller and Palese, 2014).

### **Acknowledgements (79 words)**

This work was supported, in part, by a Canadian Institutes of Health Research operating grant, a Boris Family Foundation grant, and an M.G. DeGroot Institute for Infectious Disease Research seed funding grant (M.S.M).

M.S.M was also supported, in part, by a CIHR Early Investigator Award and an Ontario Early Researcher Award. M.S.M. holds a Canada Research Chair in Viral Pandemics. A.Z is supported by a Physician Services Incorporated Research Trainee Fellowship and a CHIR Canada Graduate Scholarships – Doctoral Award. M.G.D. was supported, in part, by an Ontario Graduate Scholarship.

### **Author Contributions (29 words)**

Conceptualization, A.Z. and M.S.M.; Methodology, A.Z. and M.S.M.; Formal Analysis, A.Z., H.C., Y.A., J.C.A., and M.S.M; Investigation, A.Z., H.C., Y.A., M.R.D., and J.C.A.; Writing, A.Z. and M.S.M.; Supervision, M.S.M

### **Declaration of Interest (8 words)**

The authors have no relevant conflicts of interest.

### **Figure Legends (1160 words)**

**Figure 1** Oseltamivir potentiates ADCC induction by monoclonal stalk-binding broadly-neutralizing antibodies in a dose-dependent manner.

(A) Diagram of bNAb facilitating the interaction between immune effector cell and infected cell via two points of contact. The immune effector cell with an Fc receptor is depicted in green. The stalk-binding antibody is shown in grey and blue. The stalk-binding antibody interacts with the HA stalk domain via its Fab portion (1) and binds to the Fc receptor of the effector via its Fc portion. The HA head domain interacts with sialic acid residues on the effector cell (2). NA enzymatically cleaves sialic acids from the HA head domain, abrogating the second point of contact. NA inhibitors, such as oseltamivir, restore the second point of contact by preventing the enzymatic cleavage of HA and sialic acid.

(B-E) In vitro ADCC assays were completed using A549 cells infected with PR8 (H1N1), Cal/09 (H1N1) or X-31 (H3N2) at an MOI of 5. Fold induction depicts activation above background (infected cells without antibody). Concentrations of oseltamivir carboxylate are denoted in the legend. 6F12 (Pan H1 stalk-binding antibody) was used to target PR8 and Cal/09 infected cells, while 9H10 (Group 2 HA stalk-binding antibody) was used to target X-31 infected cells. Fold induction data is shown as mean  $\pm$  SD with biological triplicates.

**Figure 2** Oseltamivir administered in combination with bNAbs is superior at preventing and treating influenza clinical signs compared to either therapeutic alone.

275

276 (A) 6-8 week old female BALB/c mice were infected intranasally with 500 PFU of PR8 ( $5 \times LD_{50}$ ). The mice  
277 were also administered intraperitoneally with 6F12 or PBS and an oral gavage of oseltamivir or PBS. A dose of  
278 either 1mg/kg 6F12 and/or 1mg/kg oseltamivir (prophylaxis) or 10mg/kg 6F12 and/or 10mg/kg oseltamivir  
279 (treatment) were used. The first round of therapeutics was given either 2 hours before infection (prophylaxis) or  
280 48 hours after infection (treatment). Mice were then given oseltamivir or PBS by oral gavage twice daily for 5  
281 additional days following the first round of therapeutics. Weight change was monitored daily, and the animals  
282 were sacrificed when they reached 80% of initial weight.

283

284 (B-C) Weight loss and Kaplan-Meier survival curves of the mice treated prior to infection (prophylaxis group).  
285 Weight loss is shown as percent of initial weight with mean  $\pm$  SEM, n=5/group. Statistical comparisons are  
286 shown against the control IgG + PBS group; \*p<0.05, \*\*p<0.01. Numbers in brackets denote number of  
287 surviving mice and total number of mice per group.

288

289 (D-E) Weight loss and Kaplan-Meier survival curve of the mice treated after infection (treatment group).  
290 Weight loss is shown as percent of initial weight with mean  $\pm$  SEM, n=5/group. Statistical comparisons are  
291 against the control IgG + PBS group; \*p<0.05, \*\*p<0.01. Numbers in brackets denote number of surviving  
292 mice and total number of mice per group.

293

294 **Figure 3** Oseltamivir increases the potency of ADCC induction by polyclonal stalk-binding antibodies.

295

296 (A-B) ELISAs were performed using recombinant cH6/1 HA to measure the titer of H1 stalk-binding antibodies  
297 in the serum samples. Absorbance data is shown as mean  $\pm$  SD. The area under the curve is also shown as mean  
298  $\pm$  SEM.

299

300 (C-F) In vitro ADCC assays were completed using A549 cells infected with Viet/04 (H5N1) at an MOI of 5.  
301 Fold induction denotes activation above infected cells without antibody. Serum was obtained from 4 healthy  
302 donors who had been previously vaccinated with seasonal influenza virus vaccine. Fold induction data is shown  
303 as mean  $\pm$  SD.

304

305 **Figure 4** Oseltamivir is more effective at preventing influenza clinical signs in animals with higher HA stalk-  
306 binding antibody titers.

307

308 (A) 6-8 week old female BALB/c mice were administered 150ul of human serum or PBS i.p. and an oral gavage  
309 of 0.1mg/kg of oseltamivir or PBS. The serum contains either high titers polyclonal stalk-binding antibodies

(High Serum; HS), or low titers of polyclonal stalk-binding antibodies (Low Serum; LS). The mice were then infected intranasally with 200 PFU of Viet/04 ( $5 \times LD_{50}$ ) two hours later. Mice were given oseltamivir or PBS by oral gavage twice daily for 5 days. Weight change was monitored daily, and the animals were sacrificed when they reached 80% of initial weight.

(B-C) Weight loss and Kaplan-Meier survival curve of the Low Serum group. Weight loss is shown as percent of initial weight with mean  $\pm$  SEM, n=5/group. Statistical comparisons are against the PBS Control group; \*p<0.05, \*\*p<0.01. PBS+OSLT and PBS Control groups are shared between graphs depicting High Serum and Low Serum experiments for clarity. Numbers in brackets denote number of surviving mice and total number of mice per group.

(D-E) Weight loss and Kaplan-Meier survival curve of the High Serum group. Weight loss graph is shown as percent of initial weight as mean  $\pm$  SEM, n=5/group unless otherwise indicated. Statistical comparisons are against the PBS Control group; \*p<0.05, \*\*p<0.01. PBS+OSLT and PBS Control groups are shared between graphs depicting High Serum and Low Serum experiments for clarity. Numbers in brackets denote number of surviving mice and total number of mice per group.

**Figure S1** Oseltamivir inhibits neuraminidase activity and replication of H1 and H3 influenza viruses.

(A-C) Neuraminidase activity of influenza viruses PR8, Cal/09, and X-31 were measured in-vitro using the NA-Star Neuraminidase Kit (ThermoFisher). Data shown as mean  $\pm$  SD of at least two technical replicates.

(D-F) Oseltamivir susceptibility of the strains were then determined using  $1 \times 10^6$  PFU of the three strains using the NA-Star Neuraminidase Kit (ThermoFisher). The IC<sub>50</sub> values are displayed to the right of the graphs. Data shown as mean  $\pm$  SD of three technical replicates.

(G-I) Oseltamivir sensitivity of influenza virus strains was also quantified using plaque assays by infecting A549 cells with the virus at an MOI of 5 before incubating the infected cells with indicated concentrations of oseltamivir for 18 hours. N.D: not detectable. The limit of detection for the plaque assays was 25 PFU/ml, denoted by the horizontal dotted line. Data shown as mean  $\pm$  SD of three technical replicates.

**Figure S2** Immunostaining of infected A549 cells by bNAbs.

A549 cells infected with PR8 or Cal/09 were stained with 6F12 or 6F12 D265A, and cells infected with X-31 were stained with 9H10. Uninfected A549 cells were stained using 6F12, 6F12 D265A, and 9H10 as negative controls. Scale bars = 400  $\mu$ m.



345

346 **Figure S3** Characterization of polyclonal stalk-binding antibodies in human serum. Human serum was obtained  
347 from peripheral blood of two healthy adult donors.

348

349 (A-B) ELISAs were performed using chimeric cH6/1 protein to quantify the titers of antibodies that bind to the  
350 stalk domain of H1 hemagglutinin. Absorbance data is shown as mean  $\pm$  SD with technical triplicates. The area  
351 under the curve is also shown as mean  $\pm$  SEM.

352

353 (C) Hemagglutinin inhibition assays using were used to test for the presence of antibodies inhibit receptor  
354 binding by the head domain of Viet/04 H5. N.D. = Not detectable.

355

356 (D) In vitro ADCC assays were completed using A549 cells infected with Viet/04 (H5N1) at an MOI of 5. Fold  
357 induction denotes activation above background (infected cells without antibody). Fold induction data is shown  
358 as mean  $\pm$  SD with technical triplicates.

359

## 360 **Materials and Methods (1456 words)**

361

### 362 **Cells and Viruses**

363 Human adenocarcinoma alveolar basal epithelial cells (A549) and Madin-Darby Canine Kidney cells (MDCK)  
364 originally obtained from the ATCC were grown in “complete DMEM”, containing DMEM supplemented with  
365 10% (vol/vol) heat-inactivated FBS (Gibco), 100U/mL Penicillin-Streptomycin (Gibco), 2mM GlutaMAX  
366 Supplement (ThermoFisher), 10mM HEPES. PR8, X-31, and Viet/04 H5N1 HAlo viruses were propagated in  
367 specific pathogen free embryonated chicken eggs (Canadian Food Inspection Agency) (Kilbourne, 1969; Steel  
368 et al., 2009). Cal/09 H1N1 was propagated in MDCK cells.

369

### 370 **NA-Star Neuraminidase Assays**

371 NA-Star assays were completed according to manufacturer’s protocol (Invitrogen). Briefly, viruses were diluted  
372 in NA-Star Assay Buffer in white 96 well opaque flat-bottom plates to a final volume of 25  $\mu$ l per well. An  
373 additional 25  $\mu$ l per well of oseltamivir carboxylate (Toronto Research Chemicals) diluted in NA-Star Assay  
374 Buffer was added in half-log dilutions to each well. Plates were then incubated for 20 minutes at 37  $^{\circ}$ C after  
375 brief shaking. After the incubation, 10  $\mu$ l of NA-Star Substrate was added to each well and was then incubated  
376 for 30 minutes at room temperature after a brief shaking. After the incubation, 60  $\mu$ l of NA-Star Accelerator  
377 was added to each well, and luminescence was quantified using a SpectraMax i3 plate reader (Molecular  
378 Devices).



379

## 380 **Virus Quantification by Plaque Assay**

381 MDCK cells were seeded at a density of  $1 \times 10^6$  cells per well in 6 well plates. The next day, cells were infected  
382 with serial dilutions of virus diluted in  $1 \times$  minimum essential medium (MEM, Sigma) supplemented with 0.6%  
383 BSA (Sigma). After the 1-hour infection at  $37^\circ\text{C}$ , the media was replaced with “Flu Media” containing  $1 \times$   
384 MEM, 0.6 % BSA,  $1 \mu\text{g/ml}$  TPCK-treated trypsin, 0.01% DEAE-dextran, and 0.5% agar. The infected cells  
385 were then incubated at  $37^\circ\text{C}$  for 2 days. After the incubation, the cells were fixed with 10 % buffered formalin  
386 for 30 minutes at room temperature. The agar layer was then removed, and the cells were stained with crystal  
387 violet to visualize plaques.

388

## 389 **ADCC Reporter Assay**

390 A549 cells were seeded at a density of  $2 \times 10^4$  cells per well in white 96 well opaque flat-bottom plates in  
391 complete DMEM. 24 hours after seeding, cells were infected with PR8, Cal/09, X-31, or Viet/04 at an MOI of  
392 5. 16 hours after infection, the media was replaced with  $50 \mu\text{l}$  of assay buffer (RPMI 1640 supplemented with  
393 4% (vol/vol) low IgG FBS) containing oseltamivir carboxylate (Toronto Research Chemicals) and serial  
394 dilutions of monoclonal antibodies or serum. After a 30-minute incubation at  $37^\circ\text{C}$ ,  $25 \mu\text{l}$  of  $7.5 \times 10^4$  Jurkat  
395 effector cells expressing either human  $\text{Fc}\gamma\text{RIIIa}$  or murine  $\text{Fc}\gamma\text{RIV}$  (Promega) resuspended in assay buffer were  
396 added to each well. The cells were incubated for an additional 6 hours at  $37^\circ\text{C}$  before  $75 \mu\text{l}$  of Bio-Glo  
397 Luciferase Assay Reagent (Promega) was added to each well. After a 5-minute incubation at room temperature,  
398 luminescence in relative light units (RLU) was quantified using a SpectraMax i3 plate reader (Molecular  
399 Devices). Fold induction was obtained by dividing the RLU of the wells of interest by the mean of control wells  
400 containing infected target cells and Jurkat effector cells with no monoclonal antibodies/serum.

401

## 402 **Immunofluorescent Staining**

403 A549 cells were seeded at a density of  $2 \times 10^4$  cells per well in transparent 96 well flat-bottom plates in complete  
404 DMEM. 24 hours after seeding, cells were infected with PR8, Cal/09, or X-31 at an MOI of 5. 16 hours after  
405 infection, the cells were fixed using 10 % buffered formalin for 30 minutes at room temperature. After 3 washes  
406 with PBS, cells were stained with 6F12, 6F12 D265A, or 9H10 at a concentration of  $10 \mu\text{g/ml}$  diluted in PBS  
407 for one hour. After 3 washes with PBS, the cells were then stained using  $0.5 \mu\text{g/ml}$  Goat anti-mouse IgG (H+L)  
408 secondary antibody Alexa Fluor 488 (Invitrogen) diluted in PBS for one hour. After 3 washes with PBS, the  
409 cells were stained for 5 minutes with  $1 \mu\text{g/ml}$  Hoechst 33342 (Life Technologies). The cells were washed again  
410 with PBS, and images were taken on an EVOS FL Cell Imaging System (ThermoFisher).

411

## 412 **Antibody Purification**

413 Murine 6F12 and 9H10 were obtained from hybridoma cultures as previously described (Tan et al., 2014,  
414 2012). Hybridomas were thawed and expanded in ClonaCell-HY Growth Medium E (Stem Cell Technologies)  
415 up to a volume of 300ml. The media was then changed to Hybridoma-SFM (Gibco). The hybridoma cultures  
416 were harvested by centrifugation at  $3000 \times g$  for 20 minutes when cultures reached maximal cell density. The  
417 supernatant was then nutated overnight at 4 °C with 1 ml of Protein G Sepharose 4 Fast Flow slurry (Invitrogen)  
418 per 25ml of supernatant. After incubation, the supernatant/Sepharose bead slurry was passed through a 5 ml  
419 polypropylene gravity flow column (Qiagen). The column was washed with 1 column volume of PBS before  
420 being eluted with 9 ml of Elution Buffer (0.1M Glycine/HCl buffer, pH 2.2) into 1 ml of Neutralization Buffer  
421 (2M Tris-HCl, pH 10). The eluate was then concentrated and buffer exchanged to PBS using 30 kDa Amicon  
422 Ultra-15 Centrifugal Filter Units (Millipore) according to the manufacturer's instructions.

423  
424 The variable heavy and light chain sequences of 6F12 were cloned into the EcoRI/NheI sites of pFUSEss-CHIg-  
425 mG2a (D265A, Invivogen) and the EcoRI/BstAPI sites of pFUSE2ss-CLIg-mk (Invivogen) respectively. The  
426 Expi293 Expression System was used to produce the 6F12 D265A antibody according to the manufacturer's  
427 protocols (ThermoFisher). A 2:1 molar ratio of light to heavy chain plasmids was used to transfect Expi293F  
428 cells. Antibodies were purified from supernatant as described above.

### 429 **Mouse Infections**

430  
431 6-8 week old female BALB/c mice (Charles River) were anesthetized with isoflurane and intranasally infected  
432 with 40  $\mu$ l of PR8 (500 PFU,  $5 \times LD_{50}$ ) or Viet/04 (200 PFU,  $5 \times LD_{50}$ ) diluted in PBS. The mice were  
433 administered 1 mg/kg or 10 mg/kg 6F12, 150 $\mu$ l of undiluted serum, or 1mg/kg or 10mg/kg Mouse IgG Isotype  
434 Control (ThermoFisher) intraperitoneally either 2 hours before infection, or 48 hours post infection as described  
435 in the main text. The mice also received 1 mg/kg or 10 mg/kg oseltamivir phosphate (Toronto Research  
436 Chemicals) by oral gavage as described in the main text. Mice were monitored daily and were sacrificed if they  
437 reached endpoint, defined as 20 % reduction in initial body weight. All animal experiments were approved by  
438 the Animal Research Ethics Board at McMaster University.

### 439 **ELISA**

440  
441 Purified soluble cH6/1 comprised of the HA head domain of A/Mallard/Sweden/81/02 H6N1 and the stalk  
442 domain of PR8 with a C-terminal T4 trimerization domain and a 6-His tag was generated using a baculovirus  
443 expression system as previously described (Pica et al., 2012). Clear flat-bottom 96-well Immulon 4 HBX plates  
444 (ThermoFisher) were coated with 50  $\mu$ l of 2  $\mu$ g/ml of cH6/1 diluted in ELISA coating buffer (50 mM Na<sub>2</sub>CO<sub>3</sub>,  
445 50 mM NaHCO<sub>3</sub>, pH 9.4) overnight at 4 °C. After the incubation, the plates were blocked for 1 hour with 100  
446  $\mu$ l of blocking buffer (5 % milk powder in PBS with 5% Tween-20 (PBS-T)). Serum serially diluted in blocking

447 buffer was then added to the wells and incubated for 2 hours at room temperature. After the incubation, the  
448 plate was washed 3 times with PBS-T. Anti-human IgG (Fab specific) – peroxidase-conjugated antibody  
449 (Sigma) diluted 1:5000 in blocking buffer was added to the wells and incubated for 1 hour at room temperature.  
450 After 3 additional washes with PBS-T, 50µl of reconstituted SIGMAFAST OPD (Sigma) was added to each  
451 well. The reaction was stopped 10 minutes later by adding 50 µl of 3M HCl to each well, and the absorbance at  
452 490nm was read using a SpectraMax i3 plate reader (Molecular Devices).

### 453

### 454 **Hemagglutinin Inhibition Assay**

455 Chicken red blood cells diluted 1:1 in Alsever's solution (Canadian Food Inspection Agency) were diluted 1:10  
456 in PBS and centrifuged at 300 × g for 5 minutes. The supernatant was removed, and 125 µl of the red blood cell  
457 (RBC) pellet was added to 25 ml of PBS to make 0.5 % chicken RBC. Serum samples were inactivated by  
458 trypsin-heat-periodate treatment by first adding 10 µl of 8 mg/ml trypsin to 20 µl of serum before heating at 56  
459 °C for 30 minutes. After cooling the serum to room temperature, 60 µl of 0.011M KIO<sub>4</sub> was added followed by  
460 a 15-minute incubation at room temperature. The periodate treatment was inactivated by adding 60 µl of 1%  
461 glycerol (v/v) in PBS followed by a 15-minute incubation at room temperature. Lastly, 50 µl of 0.85 % NaCl  
462 (w/v) in distilled water was added to each sample to make a final 1:10 dilution of serum. The inactivated serum  
463 was then diluted 1:2 across clear V-bottom plates (Sigma) to a final volume of 25 µl. Then, 4 HA units of virus  
464 diluted PBS to a final volume of 25 µl was added to each well. Lastly, 50 µl of 0.5% chicken RBC was added to  
465 each well. The plates were read after a 1-hour incubation at 4°C.

### 466

### 467 **References**

- 468
- 469 Baudino, L., Shinohara, Y., Nimmerjahn, F., Furukawa, J., Nakata, M., Martínez-Soria, E., Petry, F., Ravetch, J.V.,  
470 Nishimura, S., Izui, S., 2008. Crucial role of aspartic acid at position 265 in the CH2 domain for murine  
471 IgG2a and IgG2b Fc-associated effector functions. *J Immunol* 181, 6664–6669.  
472 <https://doi.org/10.4049/jimmunol.181.9.6664>
- 473 Chromikova, V., Tan, J., Aslam, S., Rajabhathor, A., Bermudez-Gonzalez, M., Ayllon, J., Simon, V., García-Sastre,  
474 A., Salaun, B., Nachbagauer, R., Krammer, F., 2020. Activity of human serum antibodies in an influenza  
475 virus hemagglutinin stalk-based ADCC reporter assay correlates with activity in a CD107a degranulation  
476 assay. *Vaccine* 38, 1953–1961. <https://doi.org/10.1016/j.vaccine.2020.01.008>
- 477 DiLillo, D.J., Palese, P., Wilson, P.C., Ravetch, J.V., 2016. Broadly neutralizing anti-influenza antibodies require Fc  
478 receptor engagement for in vivo protection. *J Clin Invest* 126, 605–610. <https://doi.org/10.1172/JCI84428>
- 479 DiLillo, D.J., Tan, G.S., Palese, P., Ravetch, J.V., 2014. Broadly neutralizing hemagglutinin stalk-specific antibodies  
480 require FcγR interactions for protection against influenza virus in vivo. *Nat Med* 20, 143–151.  
481 <https://doi.org/10.1038/nm.3443>
- 482 Doll, M.K., Winters, N., Boikos, C., Kraicer-Melamed, H., Gore, G., Quach, C., 2017. Safety and effectiveness of  
483 neuraminidase inhibitors for influenza treatment, prophylaxis, and outbreak control: a systematic review of  
484 systematic reviews and/or meta-analyses. *Journal of Antimicrobial Chemotherapy* 72, 2990–3007.  
485 <https://doi.org/10.1093/jac/dkx271>
- 486 Fry, A.M., Goswami, D., Nahar, K., Sharmin, A.T., Rahman, M., Gubareva, L., Azim, T., Bresee, J., Luby, S.P.,  
487 Brooks, W.A., 2014. Efficacy of oseltamivir treatment started within 5 days of symptom onset to reduce

- 488 influenza illness duration and virus shedding in an urban setting in Bangladesh: a randomised placebo-  
489 controlled trial. *Lancet Infect Dis* 14, 109–118. [https://doi.org/10.1016/S1473-3099\(13\)70267-6](https://doi.org/10.1016/S1473-3099(13)70267-6)
- 490 He, W., Chen, C.-J., Mullarkey, C.E., Hamilton, J.R., Wong, C.K., Leon, P.E., Uccellini, M.B., Chromikova, V.,  
491 Henry, C., Hoffman, K.W., Lim, J.K., Wilson, P.C., Miller, M.S., Krammer, F., Palese, P., Tan, G.S., 2017.  
492 Alveolar macrophages are critical for broadly-reactive antibody-mediated protection against influenza A  
493 virus in mice. *Nat Commun* 8, 846. <https://doi.org/10.1038/s41467-017-00928-3>
- 494 He, W., Tan, G.S., Mullarkey, C.E., Lee, A.J., Lam, M.M.W., Krammer, F., Henry, C., Wilson, P.C., Ashkar, A.A.,  
495 Palese, P., Miller, M.S., 2016. Epitope specificity plays a critical role in regulating antibody-dependent cell-  
496 mediated cytotoxicity against influenza A virus. *Proc Natl Acad Sci U S A* 113, 11931–11936.  
497 <https://doi.org/10.1073/pnas.1609316113>
- 498 Hiba, V., Chowders, M., Levi-Vinograd, I., Rubinovitch, B., Leibovici, L., Paul, M., 2011. Benefit of early treatment  
499 with oseltamivir in hospitalized patients with documented 2009 influenza A (H1N1): retrospective cohort  
500 study. *J Antimicrob Chemother* 66, 1150–1155. <https://doi.org/10.1093/jac/dkr089>
- 501 Iuliano, A.D., Roguski, K.M., Chang, H.H., Muscatello, D.J., Palekar, R., Tempia, S., Cohen, C., Gran, J.M.,  
502 Schanzer, D., Cowling, B.J., Wu, P., Kyncl, J., Ang, L.W., Park, M., Redlberger-Fritz, M., Yu, H.,  
503 Espenhain, L., Krishnan, A., Emukule, G., van Asten, L., Pereira da Silva, S., Aungkulanon, S., Buchholz,  
504 U., Widdowson, M.-A., Bresee, J.S., Global Seasonal Influenza-associated Mortality Collaborator Network,  
505 2018. Estimates of global seasonal influenza-associated respiratory mortality: a modelling study. *Lancet* 391,  
506 1285–1300. [https://doi.org/10.1016/S0140-6736\(17\)33293-2](https://doi.org/10.1016/S0140-6736(17)33293-2)
- 507 Jefferson, T., Jones, M., Doshi, P., Spencer, E.A., Onakpoya, I., Heneghan, C.J., 2014. Oseltamivir for influenza in  
508 adults and children: systematic review of clinical study reports and summary of regulatory comments. *BMJ*  
509 348, g2545. <https://doi.org/10.1136/bmj.g2545>
- 510 Jegaskanda, S., Co, M.D.T., Cruz, J., Subbarao, K., Ennis, F.A., Terajima, M., 2017. Induction of H7N9-Cross-  
511 Reactive Antibody-Dependent Cellular Cytotoxicity Antibodies by Human Seasonal Influenza A Viruses  
512 that are Directed Toward the Nucleoprotein. *J Infect Dis* 215, 818–823. <https://doi.org/10.1093/infdis/jiw629>
- 513 Kilbourne, E.D., 1969. Future influenza vaccines and the use of genetic recombinants. *Bull World Health Organ* 41,  
514 643–645.
- 515 Kirkpatrick, E., Qiu, X., Wilson, P.C., Bahl, J., Krammer, F., 2018. The influenza virus hemagglutinin head evolves  
516 faster than the stalk domain. *Sci Rep* 8. <https://doi.org/10.1038/s41598-018-28706-1>
- 517 Kosik, I., Angeletti, D., Gibbs, J.S., Angel, M., Takeda, K., Kosikova, M., Nair, V., Hickman, H.D., Xie, H., Brooke,  
518 C.B., Yewdell, J.W., 2019. Neuraminidase inhibition contributes to influenza A virus neutralization by anti-  
519 hemagglutinin stem antibodies. *J Exp Med* 216, 304–316. <https://doi.org/10.1084/jem.20181624>
- 520 Lampejo, T., 2020. Influenza and antiviral resistance: an overview. *Eur J Clin Microbiol Infect Dis* 39, 1201–1208.  
521 <https://doi.org/10.1007/s10096-020-03840-9>
- 522 Lee, Y.-N., Lee, Y.-T., Kim, M.-C., Hwang, H.S., Lee, J.S., Kim, K.-H., Kang, S.-M., 2014. Fc receptor is not  
523 required for inducing antibodies but plays a critical role in conferring protection after influenza M2  
524 vaccination. *Immunology* 143, 300–309. <https://doi.org/10.1111/imm.12310>
- 525 Leon, P.E., He, W., Mullarkey, C.E., Bailey, M.J., Miller, M.S., Krammer, F., Palese, P., Tan, G.S., 2016. Optimal  
526 activation of Fc-mediated effector functions by influenza virus hemagglutinin antibodies requires two points  
527 of contact. *Proc Natl Acad Sci U S A* 113, E5944–E5951. <https://doi.org/10.1073/pnas.1613225113>
- 528 Miller, M.S., Gardner, T.J., Krammer, F., Aguado, L.C., Tortorella, D., Basler, C.F., Palese, P., 2013a. Neutralizing  
529 antibodies against previously encountered influenza virus strains increase over time: a longitudinal analysis.  
530 *Sci Transl Med* 5, 198ra107. <https://doi.org/10.1126/scitranslmed.3006637>
- 531 Miller, M.S., Palese, P., 2014. Peering into the crystal ball: influenza pandemics and vaccine efficacy. *Cell* 157,  
532 294–299. <https://doi.org/10.1016/j.cell.2014.03.023>
- 533 Miller, M.S., Tsibane, T., Krammer, F., Hai, R., Rahmat, S., Basler, C.F., Palese, P., 2013b. 1976 and 2009 H1N1  
534 Influenza Virus Vaccines Boost Anti-Hemagglutinin Stalk Antibodies in Humans. *The Journal of Infectious*  
535 *Diseases* 207, 98–105. <https://doi.org/10.1093/infdis/jis652>
- 536 Nachbagauer, R., Choi, A., Izikson, R., Cox, M.M., Palese, P., Krammer, F., 2016. Age Dependence and Isotype  
537 Specificity of Influenza Virus Hemagglutinin Stalk-Reactive Antibodies in Humans. *mBio* 7, e01996-01915.  
538 <https://doi.org/10.1128/mBio.01996-15>
- 539 Nachbagauer, R., Wohlbold, T.J., Hirsh, A., Hai, R., Sjursen, H., Palese, P., Cox, R.J., Krammer, F., 2014. Induction  
540 of Broadly Reactive Anti-Hemagglutinin Stalk Antibodies by an H5N1 Vaccine in Humans. *Journal of*  
541 *Virology* 88, 13260. <https://doi.org/10.1128/JVI.02133-14>



- 542 Nakamura, G., Chai, N., Park, S., Chiang, N., Lin, Z., Chiu, H., Fong, R., Yan, D., Kim, J., Zhang, J., Lee, W.P.,  
543 Estevez, A., Coons, M., Xu, M., Lupardus, P., Balazs, M., Swem, L.R., 2013. An in vivo human-plasmablast  
544 enrichment technique allows rapid identification of therapeutic influenza A antibodies. *Cell Host Microbe*  
545 14, 93–103. <https://doi.org/10.1016/j.chom.2013.06.004>
- 546 Nimmerjahn, F., Bruhns, P., Horiuchi, K., Ravetch, J.V., 2005. FcγRIV: a novel FcR with distinct IgG  
547 subclass specificity. *Immunity* 23, 41–51. <https://doi.org/10.1016/j.immuni.2005.05.010>
- 548 Noshi, T., Kitano, M., Taniguchi, K., Yamamoto, A., Omoto, S., Baba, K., Hashimoto, T., Ishida, K., Kushima, Y.,  
549 Hattori, K., Kawai, M., Yoshida, R., Kobayashi, M., Yoshinaga, T., Sato, A., Okamatsu, M., Sakoda, Y.,  
550 Kida, H., Shishido, T., Naito, A., 2018. In vitro characterization of baloxavir acid, a first-in-class cap-  
551 dependent endonuclease inhibitor of the influenza virus polymerase PA subunit. *Antiviral Research* 160,  
552 109–117. <https://doi.org/10.1016/j.antiviral.2018.10.008>
- 553 Paules, C.I., Lakdawala, S., McAuliffe, J.M., Paskel, M., Vogel, L., Kallewaard, N.L., Zhu, Q., Subbarao, K., 2017.  
554 The Hemagglutinin A Stem Antibody MEDI8852 Prevents and Controls Disease and Limits Transmission of  
555 Pandemic Influenza Viruses. *J Infect Dis* 216, 356–365. <https://doi.org/10.1093/infdis/jix292>
- 556 Pica, N., Hai, R., Krammer, F., Wang, T.T., Maamary, J., Eggink, D., Tan, G.S., Krause, J.C., Moran, T., Stein,  
557 C.R., Banach, D., Wrammert, J., Belshe, R.B., García-Sastre, A., Palese, P., 2012. Hemagglutinin stalk  
558 antibodies elicited by the 2009 pandemic influenza virus as a mechanism for the extinction of seasonal H1N1  
559 viruses. *Proc Natl Acad Sci U S A* 109, 2573–2578. <https://doi.org/10.1073/pnas.1200039109>
- 560 Rodríguez, A., Díaz, E., Martín-Loeches, I., Sandiumenge, A., Canadell, L., Díaz, J.J., Figueira, J.C., Marques, A.,  
561 Alvarez-Lerma, F., Vallés, J., Baladín, B., García-López, F., Suberviola, B., Zaragoza, R., Trefler, S.,  
562 Bonastre, J., Blanquer, J., Rello, J., H1N1 SEMICYUC Working Group, 2011. Impact of early oseltamivir  
563 treatment on outcome in critically ill patients with 2009 pandemic influenza A. *J Antimicrob Chemother* 66,  
564 1140–1149. <https://doi.org/10.1093/jac/dkq511>
- 565 Sangster, M.Y., Baer, J., Santiago, F.W., Fitzgerald, T., Ilyushina, N.A., Sundararajan, A., Henn, A.D., Krammer, F.,  
566 Yang, H., Luke, C.J., Zand, M.S., Wright, P.F., Treanor, J.J., Topham, D.J., Subbarao, K., 2013. B Cell  
567 Response and Hemagglutinin Stalk-Reactive Antibody Production in Different Age Cohorts following 2009  
568 H1N1 Influenza Virus Vaccination. *Clinical and Vaccine Immunology : CVI* 20, 867.  
569 <https://doi.org/10.1128/CVI.00735-12>
- 570 Stacey, H.D., Golubeva, D., Posca, A., Ang, J.C., Novakowski, K.E., Zahoor, M.A., Kaushic, C., Cairns, E.,  
571 Bowdish, D.M.E., Mullarkey, C.E., Miller, M.S., 2021. IgA Potentiates NETosis in Response to Viral  
572 Infection. *bioRxiv* 2021.01.04.424830. <https://doi.org/10.1101/2021.01.04.424830>
- 573 Stadlbauer, D., Zhu, X., McMahon, M., Turner, J.S., Wohlbold, T.J., Schmitz, A.J., Strohmeier, S., Yu, W.,  
574 Nachbagauer, R., Mudd, P.A., Wilson, I.A., Ellebedy, A.H., Krammer, F., 2019. Broadly protective human  
575 antibodies that target the active site of influenza virus neuraminidase. *Science* 366, 499–504.  
576 <https://doi.org/10.1126/science.aay0678>
- 577 Steel, J., Lowen, A.C., Pena, L., Angel, M., Solórzano, A., Albrecht, R., Perez, D.R., García-Sastre, A., Palese, P.,  
578 2009. Live attenuated influenza viruses containing NS1 truncations as vaccine candidates against H5N1  
579 highly pathogenic avian influenza. *J Virol* 83, 1742–1753. <https://doi.org/10.1128/JVI.01920-08>
- 580 Tan, G.S., Krammer, F., Eggink, D., Kongchanagul, A., Moran, T.M., Palese, P., 2012. A pan-H1 anti-  
581 hemagglutinin monoclonal antibody with potent broad-spectrum efficacy in vivo. *J Virol* 86, 6179–6188.  
582 <https://doi.org/10.1128/JVI.00469-12>
- 583 Tan, G.S., Lee, P.S., Hoffman, R.M.B., Mazel-Sanchez, B., Krammer, F., Leon, P.E., Ward, A.B., Wilson, I.A.,  
584 Palese, P., 2014. Characterization of a broadly neutralizing monoclonal antibody that targets the fusion  
585 domain of group 2 influenza A virus hemagglutinin. *J Virol* 88, 13580–13592.  
586 <https://doi.org/10.1128/JVI.02289-14>
- 587 Temming, A.R., Bentlage, A.E.H., de Taeye, S.W., Bosman, G.P., Lissenberg-Thunnissen, S.N., Derksen, N.I.L.,  
588 Brassier, G., Mok, J.Y., van Esch, W.J.E., Howie, H.L., Zimring, J.C., Vidarsson, G., 2020. Cross-reactivity  
589 of mouse IgG subclasses to human Fc gamma receptors: Antibody deglycosylation only eliminates IgG2b  
590 binding. *Mol Immunol* 127, 79–86. <https://doi.org/10.1016/j.molimm.2020.08.015>
- 591 Wu, N.C., Wilson, I.A., 2017. A perspective on the structural and functional constraints for immune evasion:  
592 insights from the influenza virus. *J Mol Biol* 429, 2694–2709. <https://doi.org/10.1016/j.jmb.2017.06.015>
- 593

a

bioRxiv preprint doi: <https://doi.org/10.1101/2021.11.17.468248>; this version posted November 19, 2021. The copyright holder for this preprint (which was not certified by peer review) is the author/funder, who has granted bioRxiv a license to display the preprint in perpetuity. It is made available under a [CC-BY-NC-ND 4.0 International license](https://creativecommons.org/licenses/by-nc-nd/4.0/).

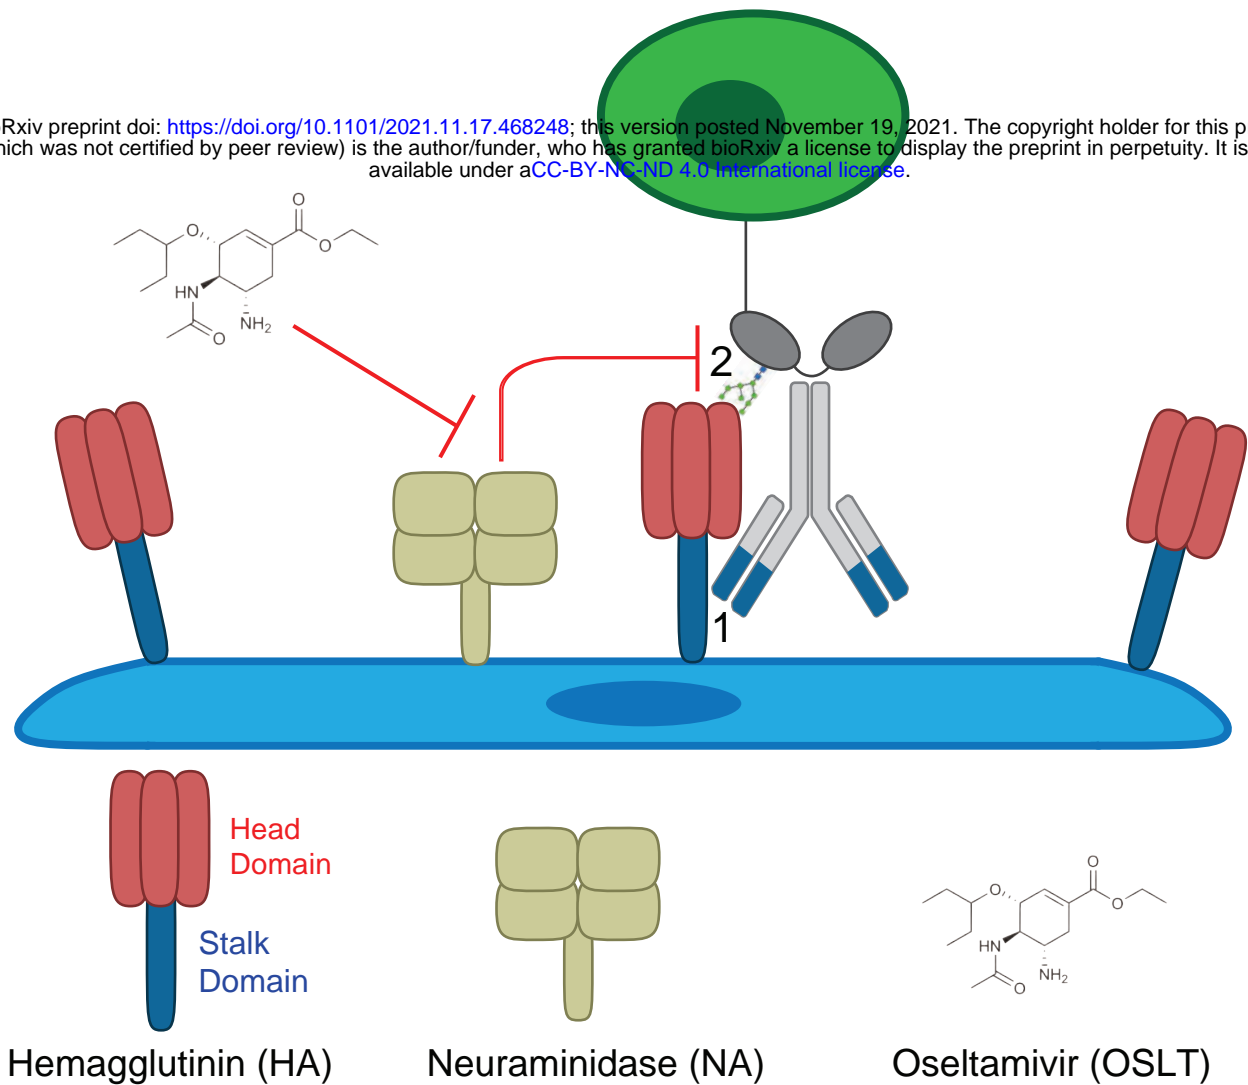

b

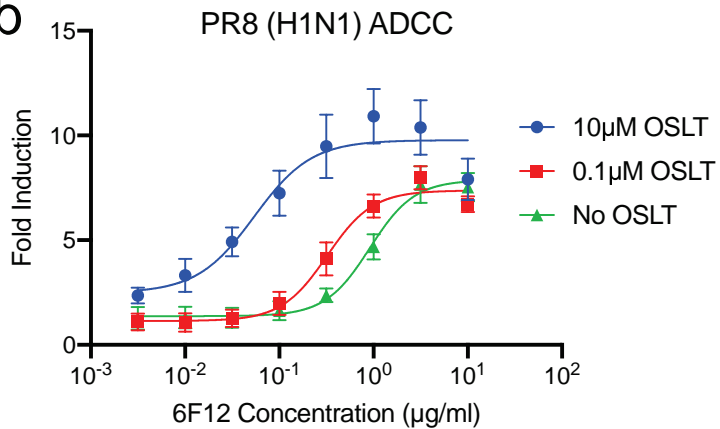

c

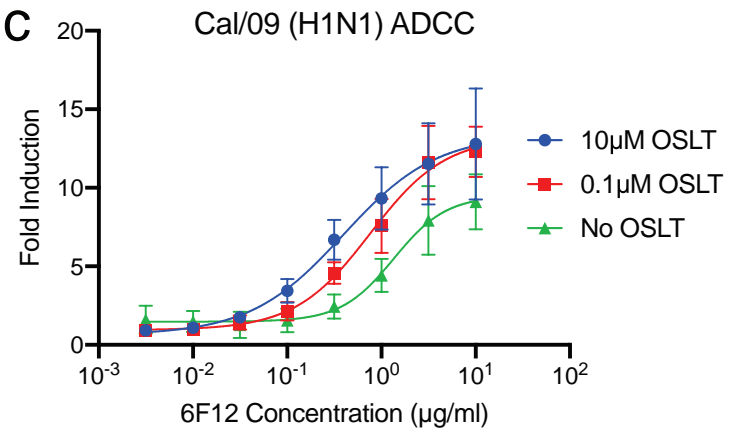

d

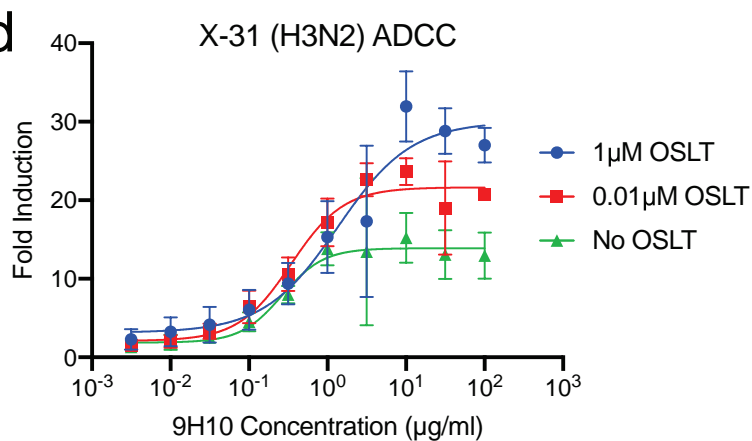

e

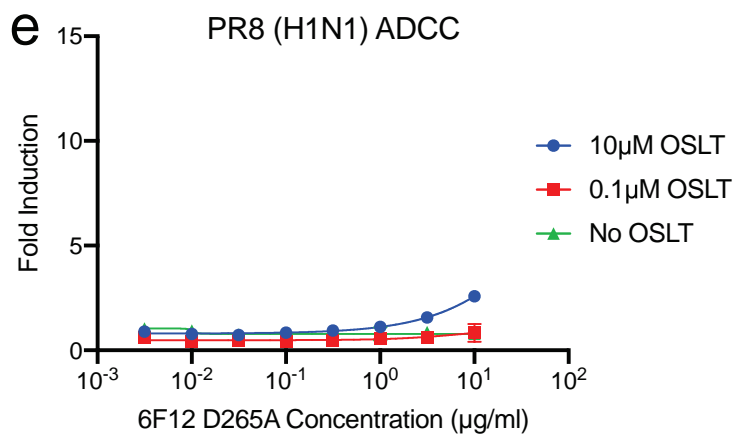

**a**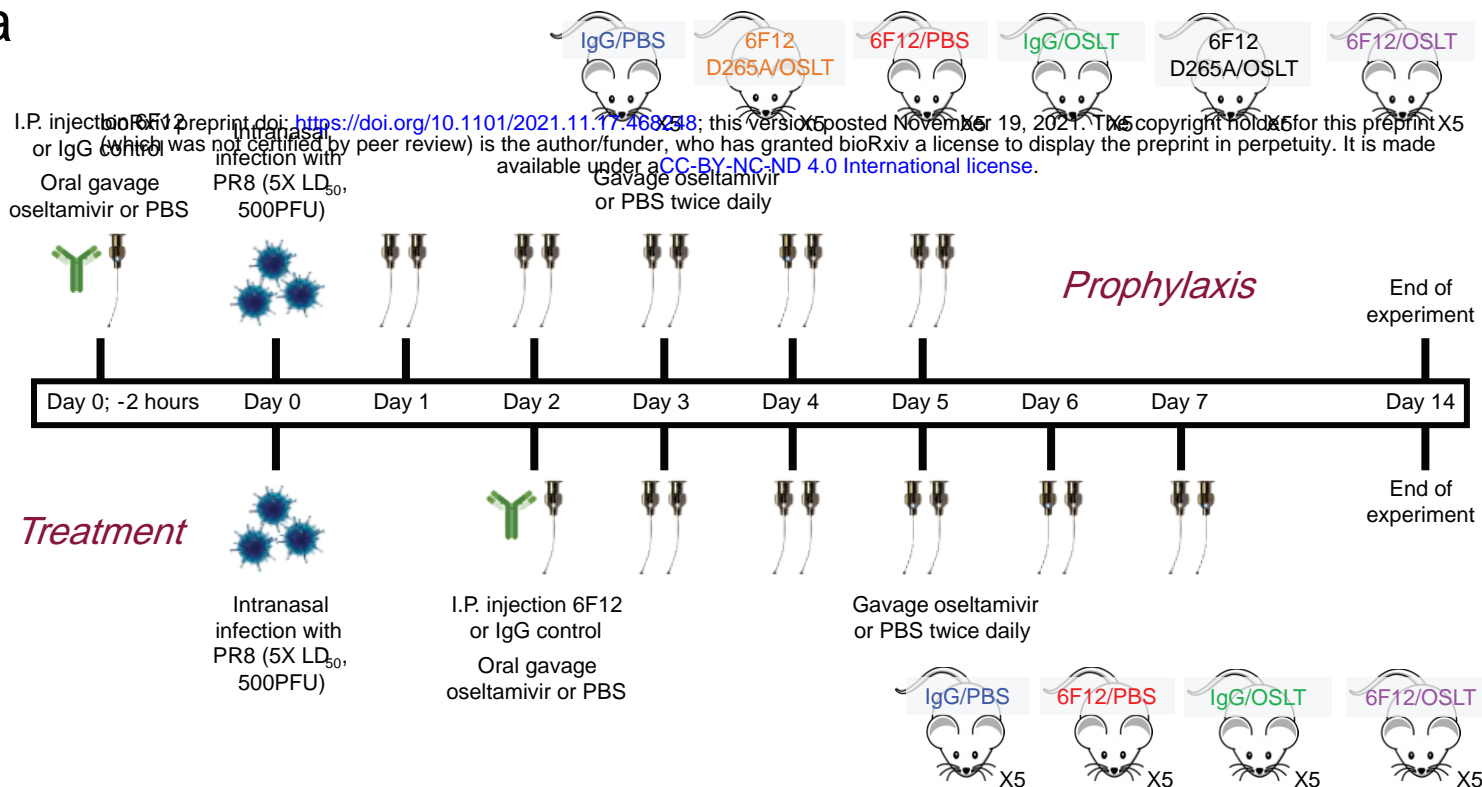**b**PR8 (5×LD<sub>50</sub>) Prophylaxis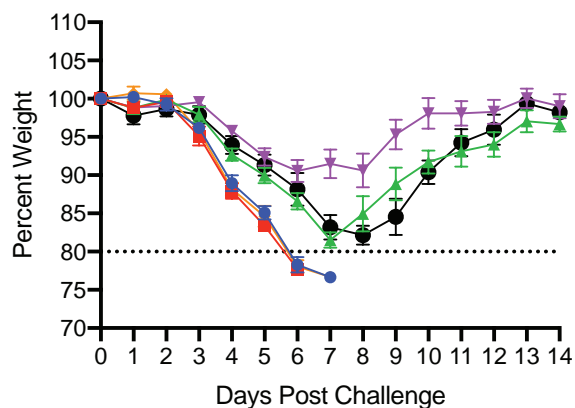**c**PR8 (5×LD<sub>50</sub>) Prophylaxis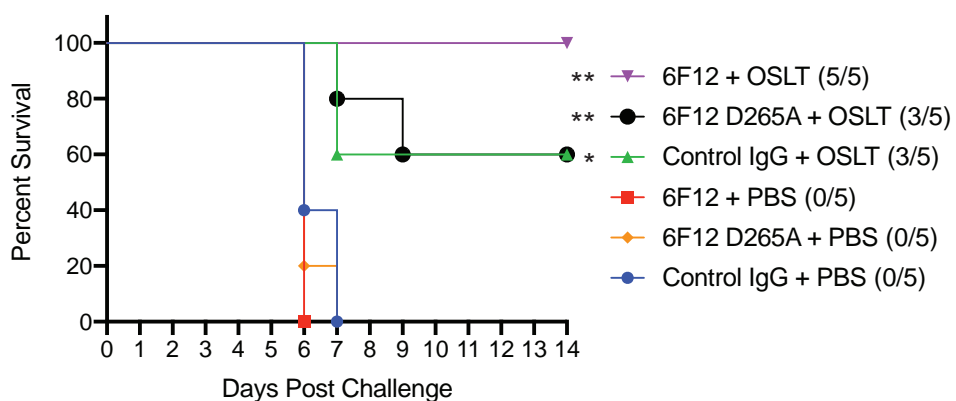**d**PR8 (5×LD<sub>50</sub>) Treatment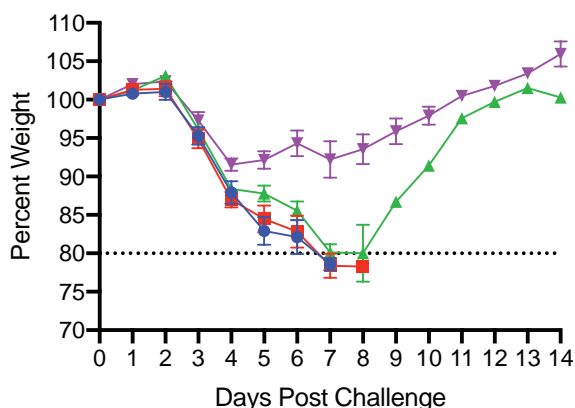**e**PR8 (5×LD<sub>50</sub>) Treatment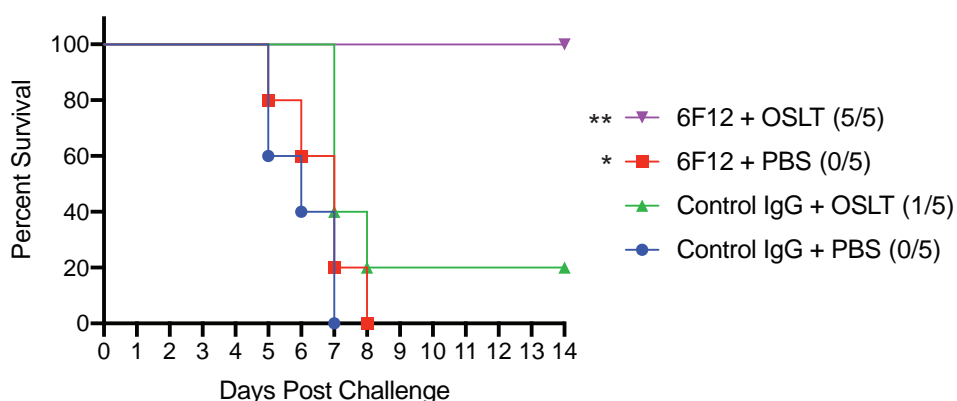



**a**

## cH6/1 ELISA

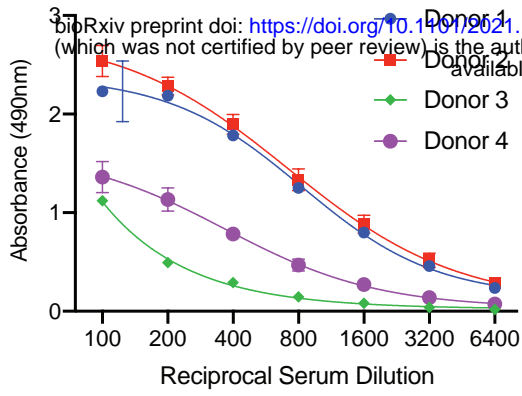**b**

## cH6/1 ELISA

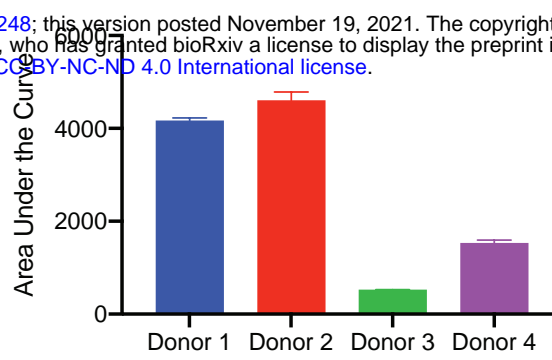**c**

## Donor 1 Viet/04 (H5N1) ADCC

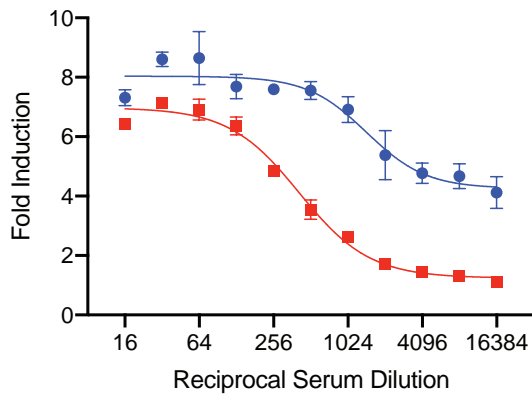**d**

## Donor 2 Viet/04 (H5N1) ADCC

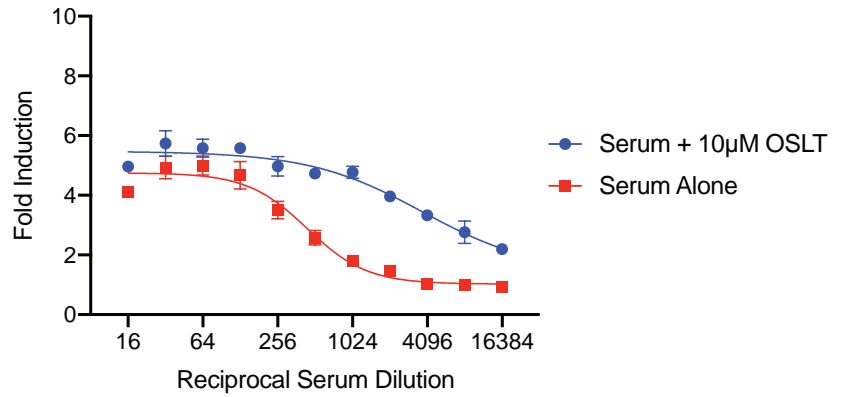**e**

## Donor 3 Viet/04 (H5N1) ADCC

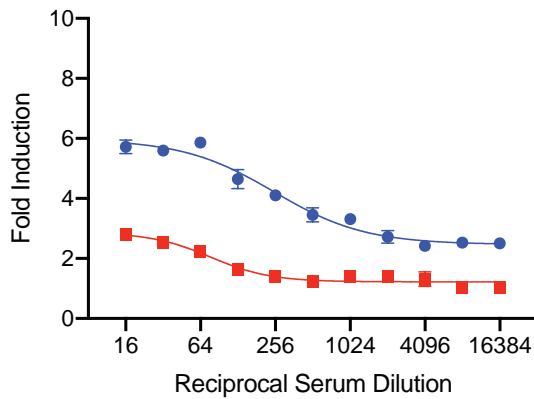**f**

## Donor 4 Viet/04 (H5N1) ADCC

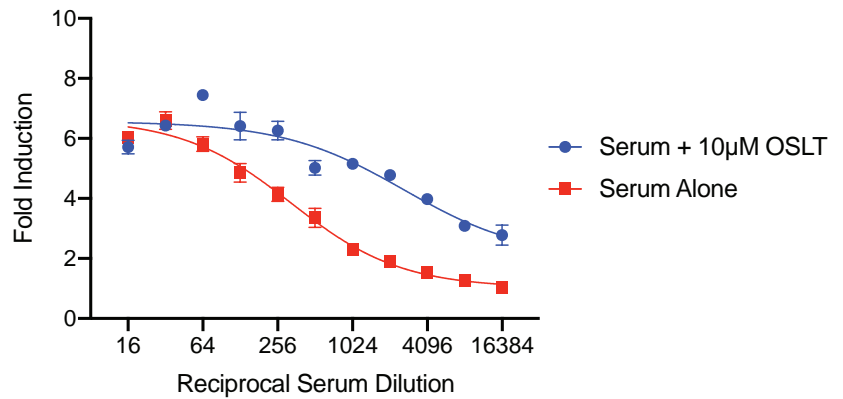

a

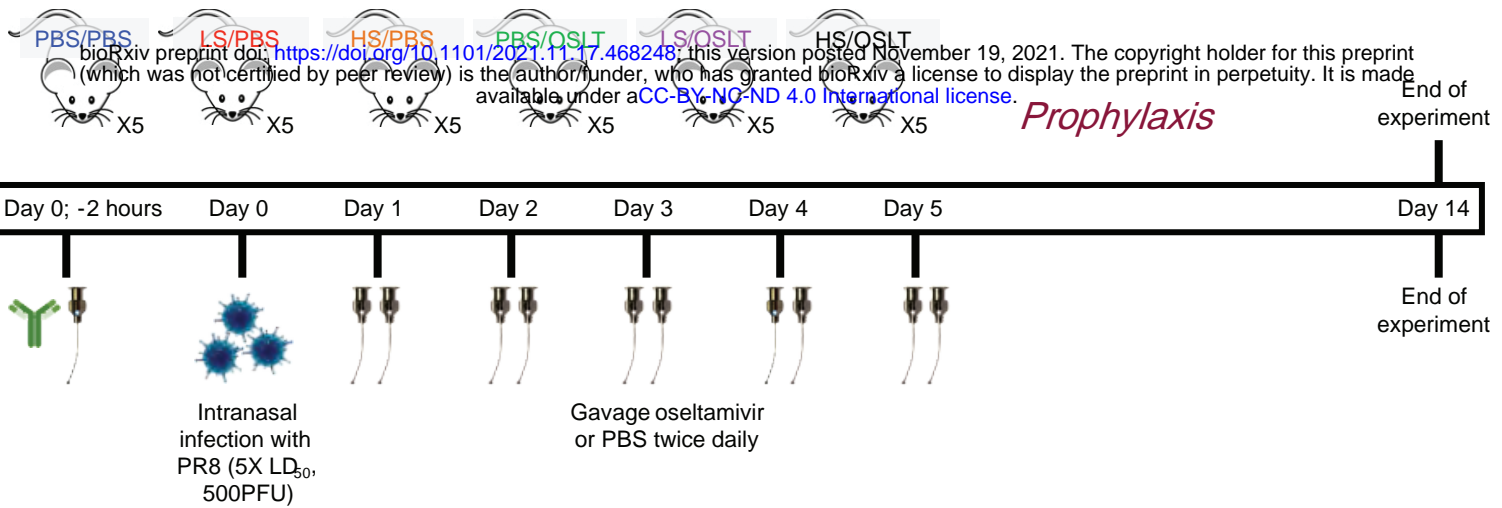

b

Viet/04 (5×LD<sub>50</sub>) Low Serum Prophylaxis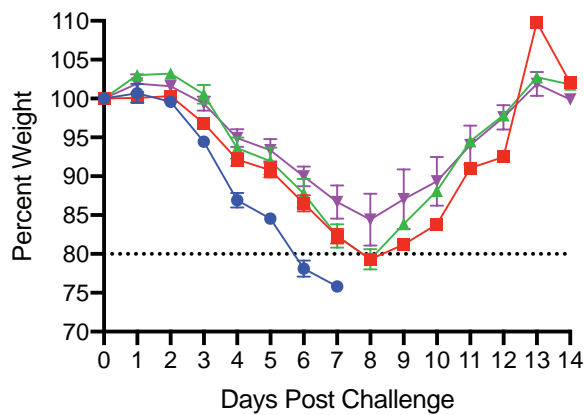

c

Viet/04 (5×LD<sub>50</sub>) Low Serum Prophylaxis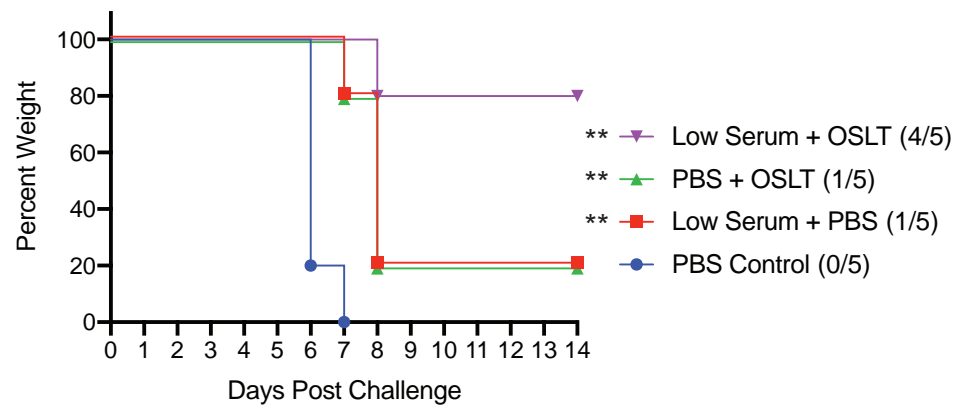

d

Viet/04 (5×LD<sub>50</sub>) High Serum Prophylaxis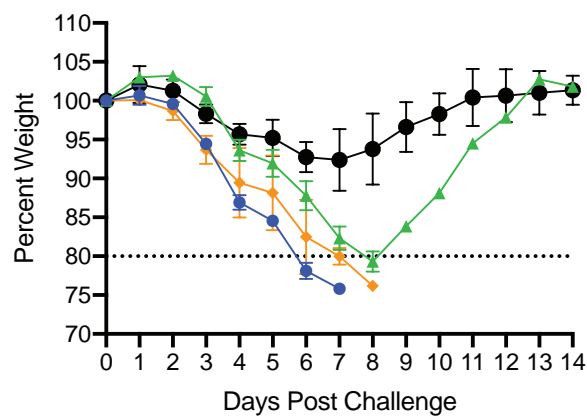

e

Viet/04 (5×LD<sub>50</sub>) High Serum Prophylaxis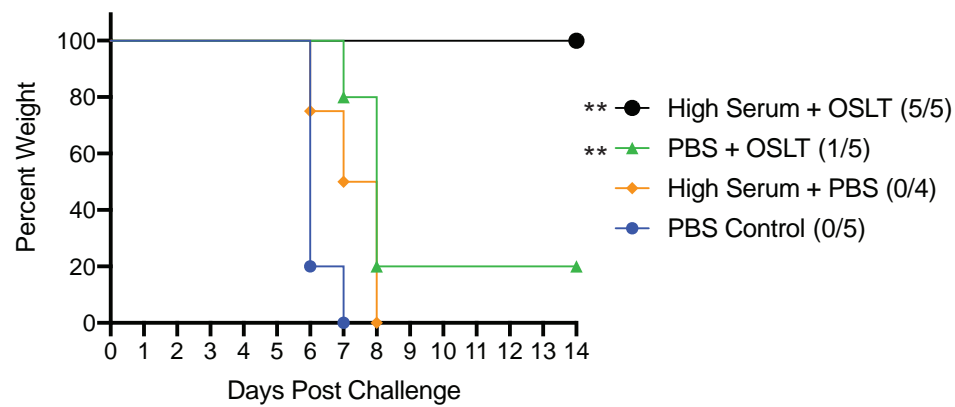

Source: https://www.biorxiv.org/content/10.1101/2021.11.17.468248v1.full.pdf
